# Supplementary material for: Impact of lockdown on children with type-1 diabetes: returning to the community was associated with a decrease in HbA1c
Source: Frontiers journal article supplement (doi:10.3389/fped.2023.1245861), 2023-12-20
Supplement: Data_Sheet_2.pdf [file Data_Sheet_2.pdf]

Impact of lockdown on children with type-1 diabetes: case report form

**Identification :** **Initials :** Last name: \_\_\_ First name: \_\_\_ Birth date \_\_\_ / \_\_\_ / \_\_\_\_\_  
Gender  M  F Current weight: \_\_\_\_\_.\_\_\_ kg  
Date of consultation / hospitalization: \_\_\_ / \_\_\_ / \_\_\_\_\_ (cross out what does not apply)

**Medical history :**

Last weight before lockdown: \_\_\_\_\_.\_\_\_ kg Date of this last weight: \_\_\_ / \_\_\_ / \_\_\_\_\_  
Date of diabetes diagnosis: \_\_\_ / \_\_\_ / \_\_\_\_\_  
Insulin therapy:  Pump  Multiple injection  Other, specify \_\_\_\_\_  
Change of insulin therapy within the last year:  Yes  No If yes, specify the date (MM/YY): \_\_\_ / \_\_\_  
Carbohydrate counting:  Yes  No  
Continuous glucose monitoring:  FSL  Enlite  Dexcom  None  Other, specify \_\_\_\_\_  
Comorbidities  Yes  No If yes, specify \_\_\_\_\_  
Treatment (other than insulin)  Yes  No If yes, specify \_\_\_\_\_

**Diabetes data BEFORE lockdown (before March 17<sup>th</sup> 2020):**

Date of last data collection before lockdown: \_\_\_ / \_\_\_ / \_\_\_\_\_  
Total insulin per day before lockdown: \_\_\_\_\_ IU/kg/d  
Number of severe hypoglycemia (with use of glucagon) within 3 months before lockdown: \_\_\_  
Number of hyperglycemia with ketosis within 3 months before lockdown: \_\_\_

**→ CGM data BEFORE lockdown:**

Mean glycemia last 30 days: \_\_\_ mg/dL and last 90 days: \_\_\_ mg/dL  
Proportion of time spent below range / in range / above range (70-180 mg/dL) last 30 days: \_\_\_ % / \_\_\_ % / \_\_\_ %  
Proportion of time spent below range / in range / above range (70-180 mg/dL) last 90 days: \_\_\_ % / \_\_\_ % / \_\_\_ %  
Average number of flash per day last 30 days: \_\_\_ and last 90 days: \_\_\_  
Proportion of data recorded last 30 days: \_\_\_ % and last 90 days: \_\_\_ %

**Diabetes data SINCE/AFTER the lockdown (since March 17<sup>th</sup> 2020):**

Total insulin per day since lockdown: \_\_\_\_\_ IU/kg/d  
Number of severe hypoglycemia (with use of glucagon) within 3 months since lockdown: \_\_\_  
Number of hyperglycemia with ketosis within 3 months since lockdown: \_\_\_

**→ CGM data SINCE/AFTER lockdown:**

Change of CGM :  Yes  No If yes, specify \_\_\_\_\_  
Mean glycemia last 30 days: \_\_\_ mg/dL and last 90 days: \_\_\_ mg/dL  
Proportion of time spent below range / in range / above range (70-180 mg/dL) last 30 days: \_\_\_ % / \_\_\_ % / \_\_\_ %  
Proportion of time spent below range / in range / above range (70-180 mg/dL) last 90 days: \_\_\_ % / \_\_\_ % / \_\_\_ %  
Average number of flash per day last 30 days: \_\_\_ and last 90 days: \_\_\_  
Proportion of data recorded last 30 days: \_\_\_ % and last 90 days: \_\_\_ %

**Biological data :**

Date and value of last 3 HbA1c **BEFORE** lockdown (before March 17<sup>th</sup> 2020):  
• \_\_\_ / \_\_\_ / \_\_\_\_\_ and value of HbA1c: \_\_\_ %  
• \_\_\_ / \_\_\_ / \_\_\_\_\_ and value of HbA1c: \_\_\_ %  
• \_\_\_ / \_\_\_ / \_\_\_\_\_ and value of HbA1c: \_\_\_ %  
Date of first HbA1c at the end of lockdown (since **May 11<sup>th</sup> 2020**) : \_\_\_ / \_\_\_ / \_\_\_\_\_ and value of HbA1c :  
\_\_\_ %  
If PCR SARS-CoV-2 performed: Date: \_\_\_ / \_\_\_ / \_\_\_\_\_ Results :  Positive  Negative  
If serology SARS-CoV-2 performed: Date: \_\_\_ / \_\_\_ / \_\_\_\_\_

Impact of lockdown on children with type-1 diabetes: case report form

- Results: IgG: PositiveNegativeNA; IgA: Positive NegativeNA; IgM: PositiveNegativeNA

**Lockdown:**

Contact of the patient by the physician by e-mail or telephone during the period of lockdown:  Yes  No

- If yes, for what reason \_\_\_\_\_

Hospitalization since March 17th 2020 :  Yes  No

- If yes, for what reason \_\_\_\_\_

- If yes, specify the date: \_\_ \_\_ / \_\_ \_\_ / \_\_ \_\_ \_\_ \_\_

Change of insulin therapy since March 17<sup>th</sup> 2020 :  Yes  No

- If yes, for what reason:

Chronic diabetes imbalance  Acute diabetes imbalance  Other, specify \_\_\_\_\_
